# Supplementary material
Source: publisher figshare collection journal article supplement (https://acs.figshare.com/ndownloader/files/12303830)
Supplement: Supplementary file 1 [file 12303830]

## Supporting Information

### Hierarchical Arrays of Cesium Lead Halide Perovskite Nanocrystals through Electrophoretic Deposition

Vikash Kumar Ravi<sup>#</sup>, Rebecca A. Scheidt, Jeffrey DuBose and Prashant V. Kamat<sup>\*</sup>

<sup>1</sup>Radiation Laboratory and Department of Chemistry and Biochemistry, University  
of Notre Dame, Notre Dame, Indiana 46556, United States

---

\*Address correspondence to this author: [pkamat@nd.edu](mailto:pkamat@nd.edu)

# Permanent Address: Department of Chemistry, Indian Institute of Science Education and Research  
(IISER), Pune, 411008, India

### Photoluminescence Quantum Yield Measurement

Photoluminescence quantum yield (PLQY) at room temperature of PbSO<sub>4</sub>-Oleate capped CsPbBr<sub>3</sub> was calculated by taking Fluorescein dye as reference dissolved in 0.1 M NaOH. The nanocrystals were dispersed in hexane. The PLQY of PbSO<sub>4</sub>-Oleate capped CsPbCl<sub>3</sub> and CsPbI<sub>3</sub> were then calculated relative to that of CsPbBr<sub>3</sub>. To calculate the PLQY the following equation was used:

$$QY_s = QY_{ref} \cdot \frac{F_s}{F_{ref}} \cdot \frac{A_{ref}(\lambda_{exc})}{A_s(\lambda_{exc})} \cdot \frac{n_s^2}{n_{ref}^2}$$

Where,

$QY_s$  = Unknown PL quantum yield of sample.

$QY_{ref}$  = Known PL quantum yield of reference.

$F_s$  = Integrated PL intensity; *i.e.* area under the PL curve of the sample at fixed excitation wavelength.

$F_{ref}$  = Integrated PL intensity; *i.e.* area under the PL curve of the reference at fixed excitation wavelength.

$A_{ref}(\lambda_{exc})$  = Absorbance value of the reference in its absorbance spectrum at that fixed PL excitation wavelength.

$A_s(\lambda_{exc})$  = Absorbance value of the sample in its absorption spectrum at that fixed PL excitation wavelength.

$n_s$  = Refractive index of the solvent in which sample is dispersed.

$n_{ref}$  = Refractive Index of the solvent in which reference is dispersed.

### Concentration of Deposited Film Calculations

The concentration of PbSO<sub>4</sub>-Oleate capped nanocrystals was calculated in the following manner for CsPbBr<sub>3</sub> capped NC's

$$A = \epsilon cl$$

$$1.47 = 3.83 \times 10^6 M^{-1} cm^{-1} \times c \times 1 cm$$

$$c \cong 0.39 \mu M$$

$$volume\ of\ solution = 3.1\ mL$$

$$\frac{0.39\ \mu moles}{1,000\ mL} \times 3.1\ mL = 1.2\ nmoles$$

$$Area\ of\ deposition = 1.5\ cm^2$$

$$\frac{Concentration}{Area} = \frac{1.2\ nmoles}{1.5\ cm^2} = 0.8\ \frac{nmoles}{cm^2}$$

Where

$A$  = The absorbance of the film. This was calculated by taking the absorbance of the solution at  $t = 0$  (before any EPD) and absorbance at  $t = t$  (after EPD). These values can be seen in **Figure 2C and 2D**.

$\varepsilon$  = The molar absorptivity. Values for molar absorptivity were taken from reference 2.

$c$  = concentration of the deposited nanocrystals

$l$  = length of the cuvette (1 cm)

This procedure was repeated for PbSO<sub>4</sub>-Oleate capped CsPbI<sub>3</sub> nanocrystals where the molar absorptivity was  $2.4 \times 10^6 \text{ M}^{-1}\text{cm}^{-1}$ . The concentration for these films were found to be  $0.9 \frac{\text{nmoles}}{\text{cm}^2}$

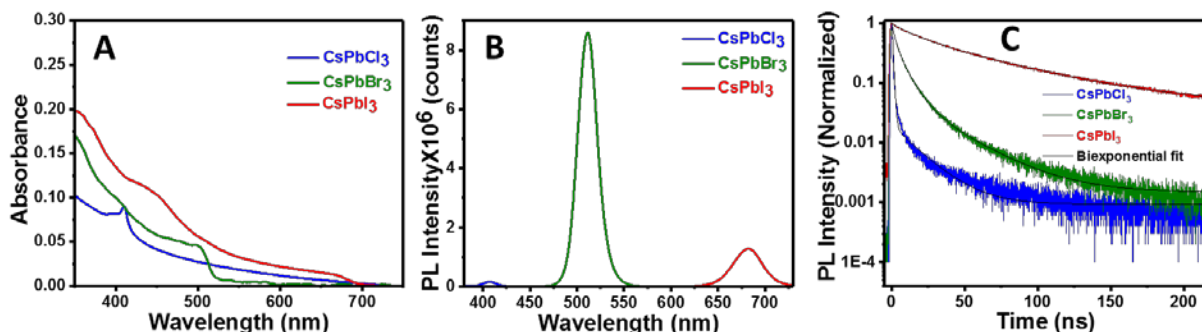

**Figure S1:** (A) Absorbance spectra (B) Emission spectra of PbSO<sub>4</sub>-Oleate capped CsPbX<sub>3</sub> nanocrystals in hexane for determination of photoluminescence quantum yield. (C) Emission decay spectra of PbSO<sub>4</sub>-Oleate capped CsPbX<sub>3</sub> nanocrystals dispersed in hexane monitored at their emission peak maxima (CsPbCl<sub>3</sub>= 407 nm, CsPbBr<sub>3</sub>= 511 nm and CsPbI<sub>3</sub>= 682 nm) .

**Table S1:** Photoluminescence quantum yield values along with average lifetime and calculate radiative and non-radiative rate constant ( $\tau = 1/(k_r + k_{nr})$  and  $\Phi = k_r/(k_r + k_{nr})$ ) for PbSO<sub>4</sub>-Oleate capped CsPbX<sub>3</sub> nanocrystals.

| Sample              | Quantum Yield, $\phi$ (%) | $\tau_{avg}$ (ns) | $k_r$ ( $\phi/\tau_{avg}$ )(ns <sup>-1</sup> ) | $k_{nr}$ (ns <sup>-1</sup> ) |
|---------------------|---------------------------|-------------------|------------------------------------------------|------------------------------|
| CsPbCl <sub>3</sub> | 0.02                      | 5.7               | 0.0035                                         | 0.1719                       |
| CsPbBr <sub>3</sub> | 0.73                      | 17.5              | 0.0417                                         | 0.0154                       |
| CsPbI <sub>3</sub>  | 0.12                      | 56.1              | 0.0021                                         | 0.0157                       |

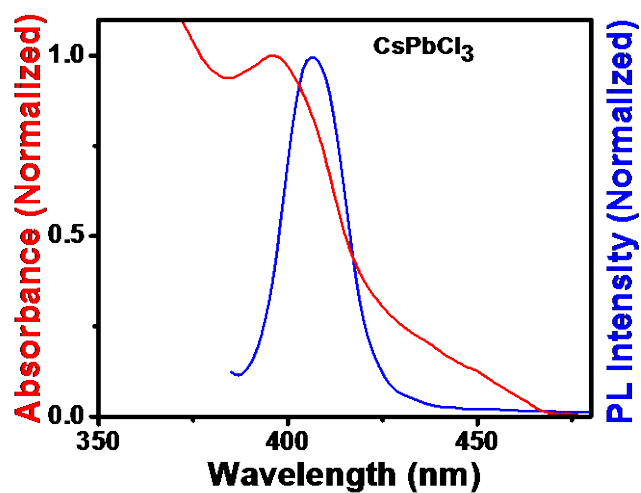

**Figure S2:** UV-Vis absorbance and Emission spectra of PbSO<sub>4</sub>-Oleate capped CsPbCl<sub>3</sub> nanocrystals. (Excitation wavelength was 370 nm)

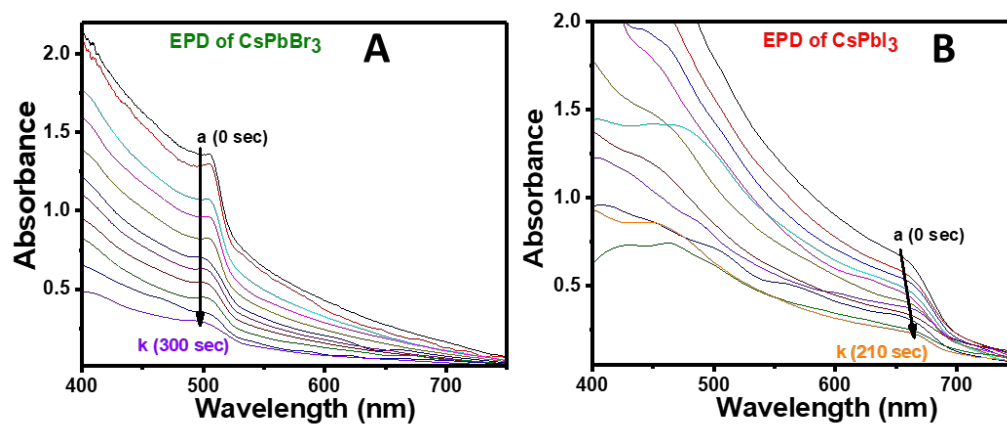

**Figure S3:** Absorbance spectra of (A) PbSO<sub>4</sub>-Oleate capped CsPbBr<sub>3</sub> nanocrystals (B) PbSO<sub>4</sub>-Oleate capped CsPbI<sub>3</sub> nanocrystal solutions recorded at different times during electrophoretic deposition.

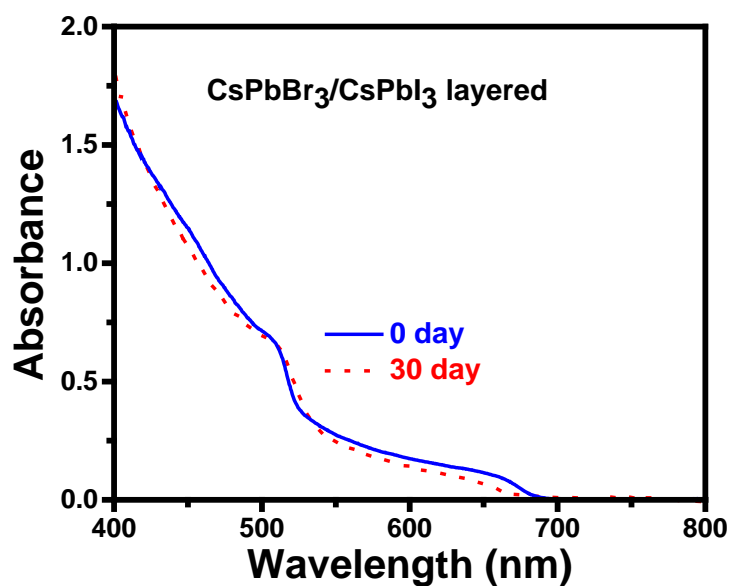

**Figure S4:** UV-Vis absorbance spectra showing the stability of the  $\text{PbSO}_4$ -Oleate capped  $\text{CsPbBr}_3/\text{CsPbI}_3$  layered film stored under ambient condition. The excitonic peaks for bromide and iodide were preserved indicating no intermixing of the nanocrystals.

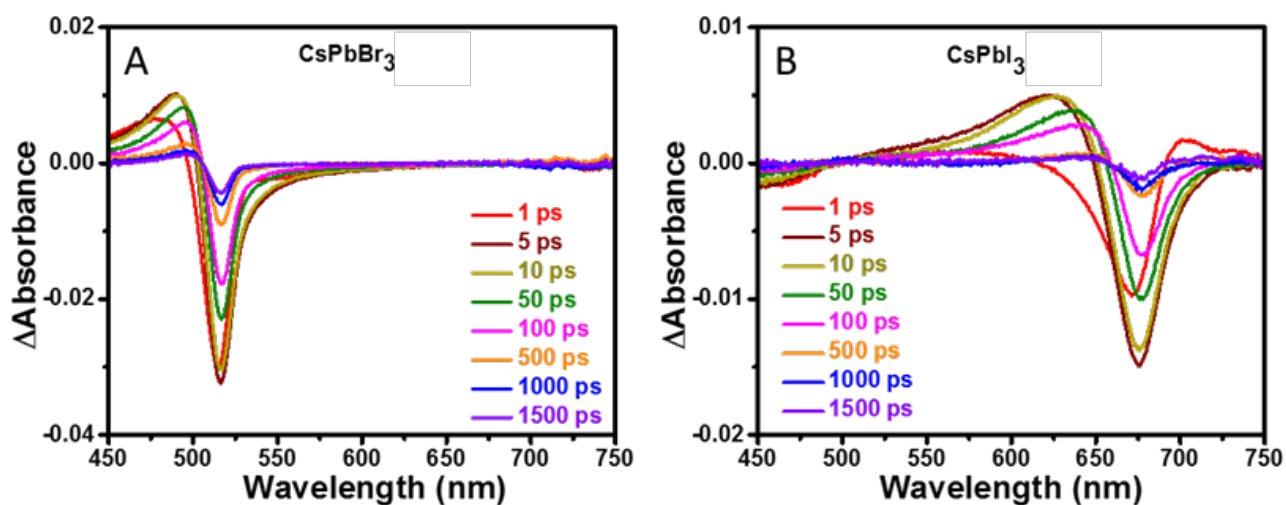

**Figure S5:** Transient absorption spectra recorded following 387 nm laser pulse excitation of  $\text{PbSO}_4$ -Oleate capped (A)  $\text{CsPbBr}_3$  and (B)  $\text{CsPbI}_3$  films (electrophoretically deposited).

**Table S2:** (Time correlated single photon counting) TCSPC decay analysis of PbSO<sub>4</sub>-Oleate capped CsPbBr<sub>3</sub>, CsPbI<sub>3</sub>, and CsPbBr<sub>3</sub>/CsPbI<sub>3</sub> layered films (Exc. = 370 nm).

Emission originating from CsPbBr<sub>3</sub> was monitored at 520 nm and that of CsPbI<sub>3</sub> was at 675 nm.

**CsPbBr<sub>3</sub> emission @520 nm**

| Sample                                          | A <sub>1</sub> (%) | τ <sub>1</sub> (ns) | A <sub>2</sub> (%) | τ <sub>2</sub> (ns) | τ <sub>avg</sub> (ns) |
|-------------------------------------------------|--------------------|---------------------|--------------------|---------------------|-----------------------|
| CsPbBr <sub>3</sub>                             | 76                 | 1.1                 | 24                 | 12.4                | 9.9                   |
| CsPbBr <sub>3</sub> /CsPbI <sub>3</sub> layered | 93                 | 1.0                 | 7                  | 8.2                 | 3.7                   |

**CsPbI<sub>3</sub> emission @675 nm**

| Sample                                          | A <sub>1</sub> (%) | τ <sub>1</sub> (ns) | A <sub>2</sub> (%) | τ <sub>2</sub> (ns) | τ <sub>avg</sub> (ns) |
|-------------------------------------------------|--------------------|---------------------|--------------------|---------------------|-----------------------|
| CsPbI <sub>3</sub>                              | 92                 | 4.9                 | 8                  | 29.5                | 13.4                  |
| CsPbBr <sub>3</sub> /CsPbI <sub>3</sub> layered | 90                 | 5.3                 | 10                 | 29.6                | 14.6                  |

---

RGB Color combination:

Blue + Green = Cyan

Green + Red = Yellow

Blue + Red = Magenta

Blue + Green + Red = White

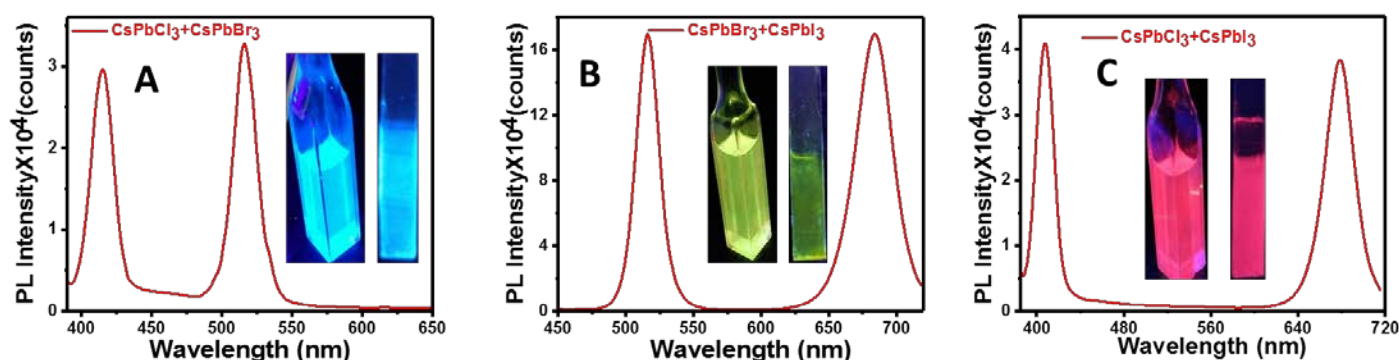

**Figure S6:** Scheme showing RGB (Red, Green, and Blue) color combination. PbSO<sub>4</sub>-Oleate capped nanocrystals were mixed and (A) cyan light was generated by mixing CsPbCl<sub>3</sub> and CsPbBr<sub>3</sub>, (B) yellow light was generated by mixing CsPbBr<sub>3</sub> and CsPbI<sub>3</sub>, and (C) magenta light was generated by mixing CsPbCl<sub>3</sub> and CsPbI<sub>3</sub>. Insets show the photographs of the colloidal solutions and the deposited films on FTO/TiO<sub>2</sub> under UV light.

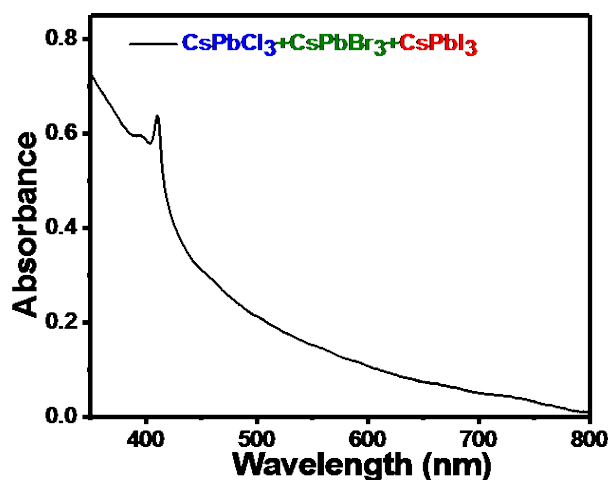

**Figure S7:** UV-Vis absorbance spectra for the mixed PbSO<sub>4</sub>-Oleate capped CsPbX<sub>3</sub> nanocrystals, which emits white light. CsPbCl<sub>3</sub> excitonic peak is more dominant as it was added in excess compared to bromide or iodide counterpart to account for low quantum yield and charge transfer.



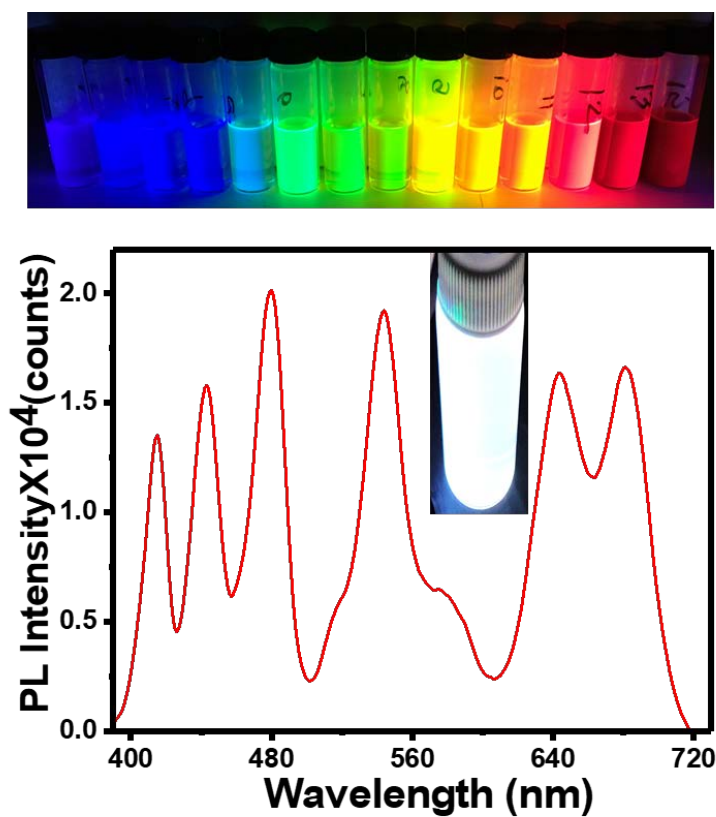

**Figure S8:** The photograph shows the PbSO<sub>4</sub>-Oleate capped CsPbX<sub>3</sub> (X= Cl, Br, I) nanocrystals with varying compositions and thus emission covering the entire visible range. The spectrum shows the generation of white light by mixing different CsPbX<sub>3</sub> compositions to have a better color purity of white light. The inset shows the photograph of colloidal dispersion showing white emission under UV light.

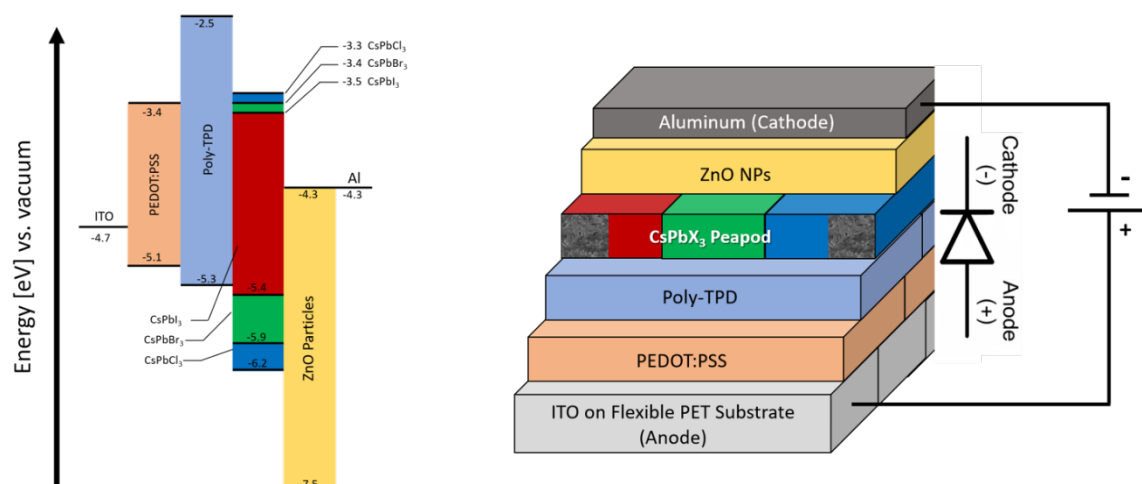

**Figure S9:** Band diagram and device stack showing how preliminary LEDs have been fabricated. The device architecture and procedures for fabrication were based on a previously reported method<sup>1</sup>. The active layer of  $\text{CsPbX}_3$  was deposited via EPD onto the ITO substrate after deposition of PEDOT:PSS and Poly-TPD. Values for the conduction band minima and valence band maxima of the materials were taken from the literature.<sup>10,46</sup>

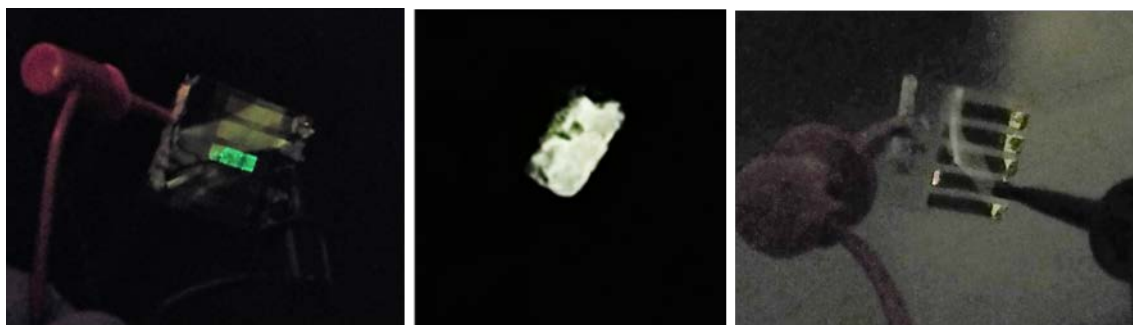

**Figure S10:**  $\text{CsPbBr}_3$  and  $\text{CsPbX}_3$  mixed halide film-based LEDs displaying characteristic green and white light emission. Left panel: LED based on  $\text{CsPbBr}_3$  nanocrystals. Middle and Right panels: white light emission from  $\text{CsPbX}_3$  LED.

#### References:

- (10) Ravi, V. K.; Markad, G. B.; Nag, A. *ACS Energy Lett.* **2016**, *1*, 665.
- (46) Zaiats, G.; Ikeda, S.; Kinge, S.; Kamat, P. V. *ACS Appl. Mater. & Interfaces* **2017**, *9*, 30741.
